# Supplementary material
Source: PubMed Central journal article supplement (PMC5777626)
Supplement: NIHMS75018-supplement-Supplemenatry_information.pdf [file NIHMS75018-supplement-Supplemenatry_information.pdf]

## **Supplementary Material**

for

**The genetic basis and evolution of red blood cell sickling in deer**

A Esin, LT Bergendahl, V Savolainen, JA Marsh & T Warnecke

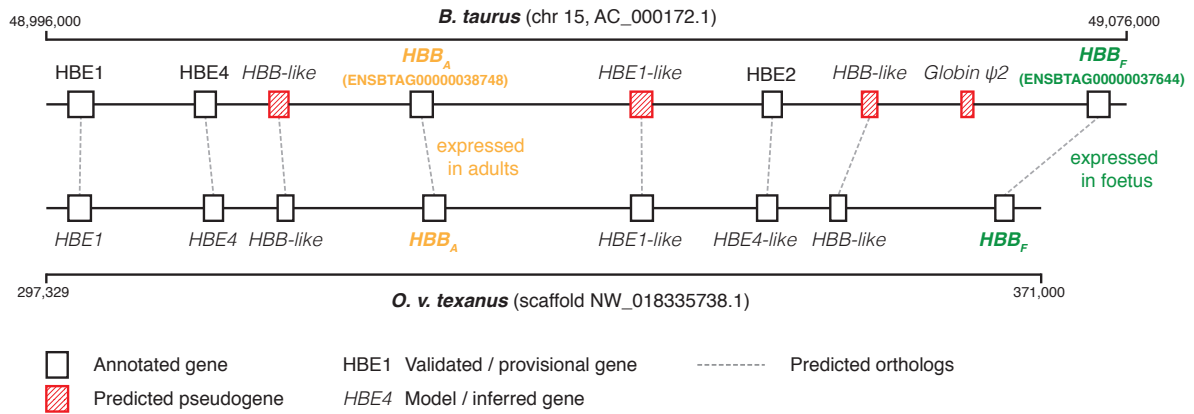

### Supplementary Figure 1

**The  $\beta$ -globin locus.** Comparison of the *Bos taurus* (UMD 3.1.1) and *Odocoileus virginianus texanus* (Ovir.te 1.0)  $\beta$ -globin locus. Genetic elements for both loci are shown as predicted in the NCBI genome browser. Pseudogene labels are assigned as in REF. 26. Orthology relationships are supported by highest BLAST matches of mRNAs (or gene models where no mRNA is available) between the two genomes. *B. taurus* genes in this locus have no additional matches in the *O. v. texanus* assembly outside of the locus presented here, suggesting that the locus has not duplicated further in deer. As adult and foetal  $\beta$ -globin genes are not classically denoted HBB<sub>A</sub> and HBB<sub>F</sub> in cattle, we provide Ensembl gene IDs for unambiguous identification.

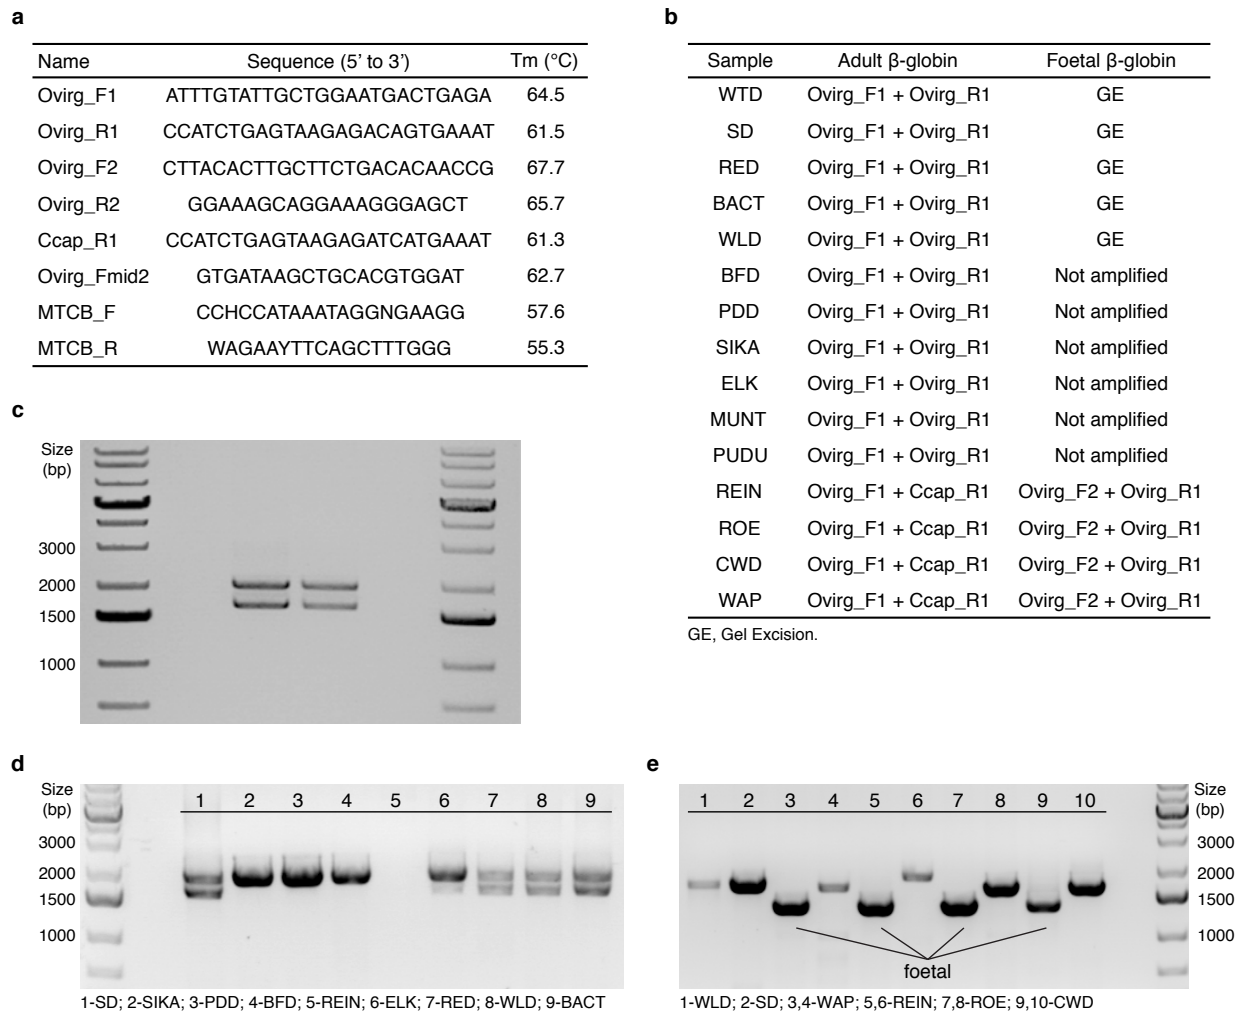

## Supplementary Figure 2

**Amplification of deer  $\beta$ -globin genes.** **a**, Primers used in this study. **b**, Primer combinations used to amplify adult and foetal  $\beta$ -globin genes in different species. Where possible, gel excision was used to isolate the co-amplified foetal  $\beta$ -globin band. In certain cases, the adult gene could also be selectively amplified using primers Ovirg\_F1/Ovirg\_R2 (see panel e, lanes 1,2). **c**, Agarose gel showing co-amplification of adult and foetal  $\beta$ -globin genes in white-tailed deer with Ovirg\_F1/Ovirg\_R1; the two lanes show two different individuals. **d**, Agarose gel showing heterogeneity of amplification products in different deer using Ovirg\_F1/Ovirg\_R1. **e**, Agarose gel showing selective amplification of adult and foetal  $\beta$ -globin genes. Lanes 1 & 2: adult  $\beta$ -globin using Ovirg\_F1/Ovirg\_R2; all other lanes with primer combinations described in panel b. See Supplementary Table 1 for sample abbreviations.

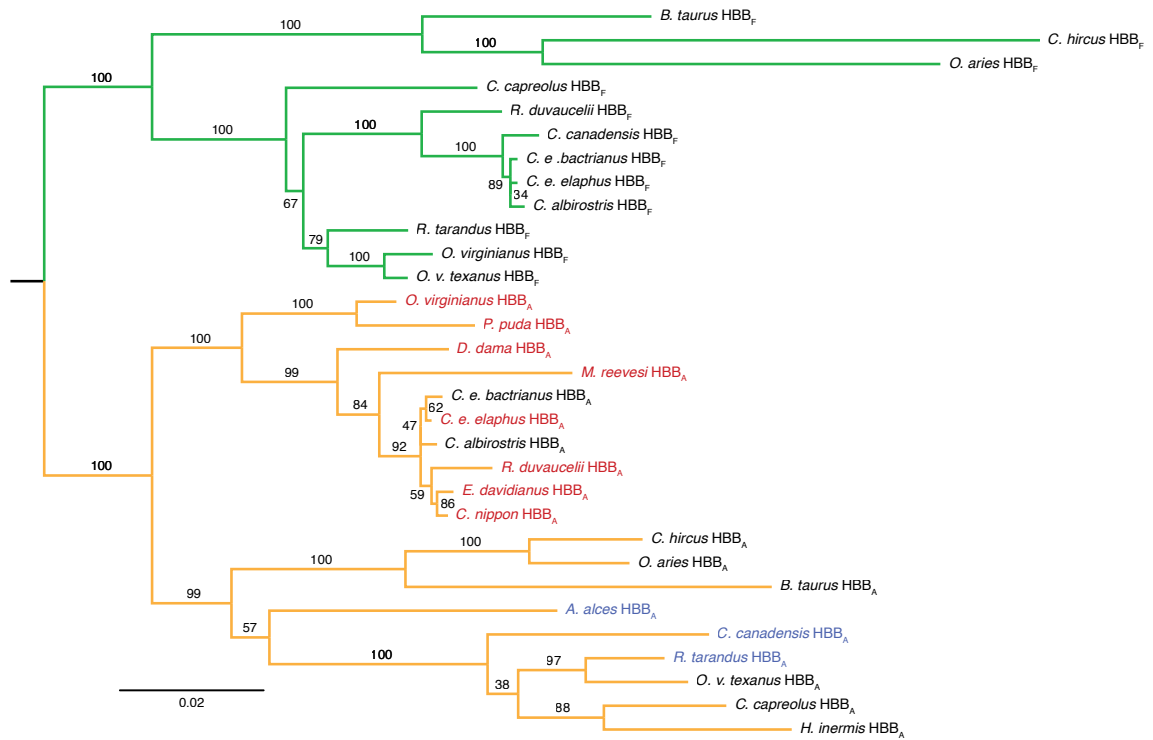

### Supplementary Figure 3

#### Putative HBB<sub>A</sub> and HBB<sub>F</sub> genes cluster separately on an HBB<sub>A</sub>/HBB<sub>F</sub> gene tree.

The tree is a maximum likelihood reconstruction based on a nucleotide alignment of genic sequences (coding exons and intervening introns; see Methods). The sequence of *H. inermis* HBB<sub>F</sub> was only partially resolved and is hence omitted. Branches are coloured as adult (orange) or foetal (green). Tip labels for HBB<sub>A</sub> are coloured according to the species' propensity to sickle (red = majority sickling, blue = majority non-sickling, black=undetermined). Bootstrap values (%) are derived from 1000 bootstrap replicates (see Methods for further information on tree reconstruction). The scale bar shows the number of nucleotide substitutions per site.

**a**

| ID of reconstructed transcript | Transcript length | Predicted product                                                 | Genbank ID (species)*                                             | Abundance (TPM) |
|--------------------------------|-------------------|-------------------------------------------------------------------|-------------------------------------------------------------------|-----------------|
| DN5482_c3_g1_i1                | 731               | $\alpha$ -globin chain                                            | JF811751.1 ( <i>Pantholops hodgsonii</i> )                        | 325146          |
| DN1442_c2_g1_i1                | 294               | $\beta$ -globin mRNA                                              | NM_001014902.3 ( <i>Bos taurus</i> )                              | 285287          |
| DN27361_c1_g1_i1               | 747               | $\beta$ -globin mRNA                                              | XM_006061581.1 ( <i>Bubalus bubalis</i> )                         | 224345          |
| DN10562_c0_g1_i1               | 651               | ubiquitin A-52 residue ribosomal protein fusion product 1 (UBA52) | XM_019963827.1 ( <i>Bos indicus</i> )                             | 2255            |
| DN9617_c0_g5_i1                | 322               | 16S bacterial ribosomal RNA gene                                  | CP019213.1, nucleotides 680747-681068 ( <i>Escherichia coli</i> ) | 2219            |
| DN27542_c0_g1_i1               | 2033              | 5'-aminolevulinic acid synthase 2 (ALAS2)                         | XM_005894452.1 ( <i>Bos mutus</i> )                               | 2010            |
| DN20291_c0_g1_i1               | 621               | S100 calcium binding protein A12 (S100A12)                        | XM_005909570.2 ( <i>Bos mutus</i> )                               | 1850            |
| DN52287_c4_g1_i1               | 2893              | 18S ribosomal RNA gene                                            | JN412502.1 ( <i>Bubalus bubalis</i> )                             | 1478            |
| DN5641_c0_g1_i1                | 979               | ferritin heavy chain 1 (FTH1)                                     | NM_174062.3 ( <i>Bos taurus</i> )                                 | 1404            |
| DN9617_c0_g2_i1                | 1480              | 16S bacterial ribosomal RNA gene                                  | CP018801.1 (4464861-4466340) ( <i>Escherichia coli</i> )          | 1348            |

\*Best match in the non-redundant nucleotide database (queried using MegaBLAST); TPM, transcripts per million.

**b**

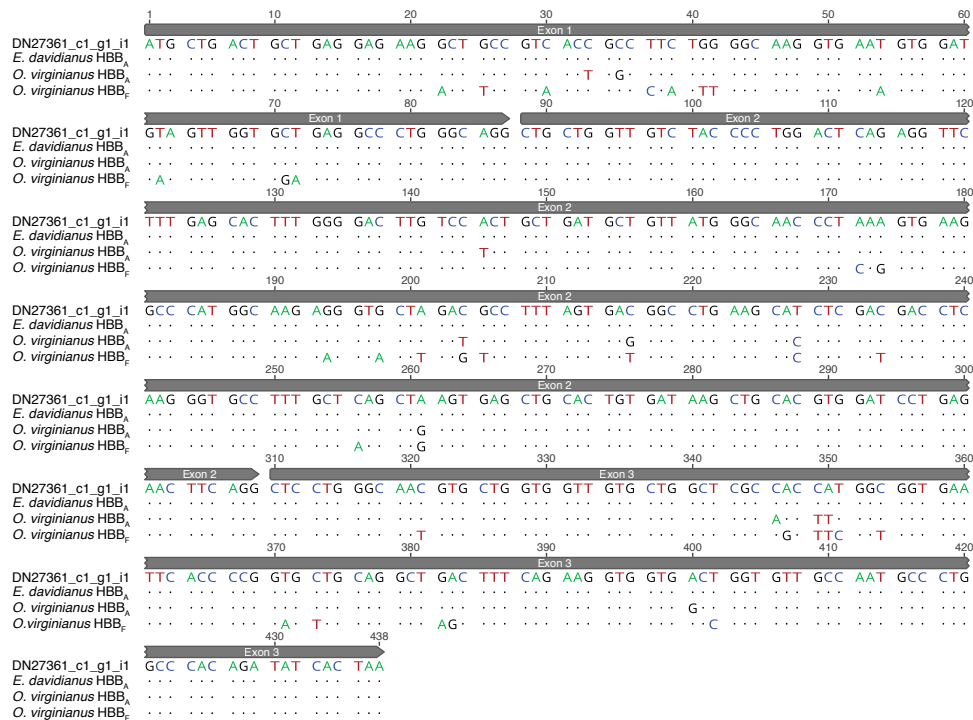

## Supplementary Figure 4

**Reconstructing the adult  $\beta$ -globin sequence from RNA sequencing data.** **a**, The ten most abundant transcripts in the *de novo*-assembled *E. davidianus* red blood cell transcriptome. **b**, Nucleotide alignment of the *E. davidianus*  $\beta$ -globin CDS derived from the *de novo* transcriptome assembly, the putative *E. davidianus* adult  $\beta$ -globin CDS derived from amplification, and the foetal and adult  $\beta$ -globin CDSs from *O. virginianus*.

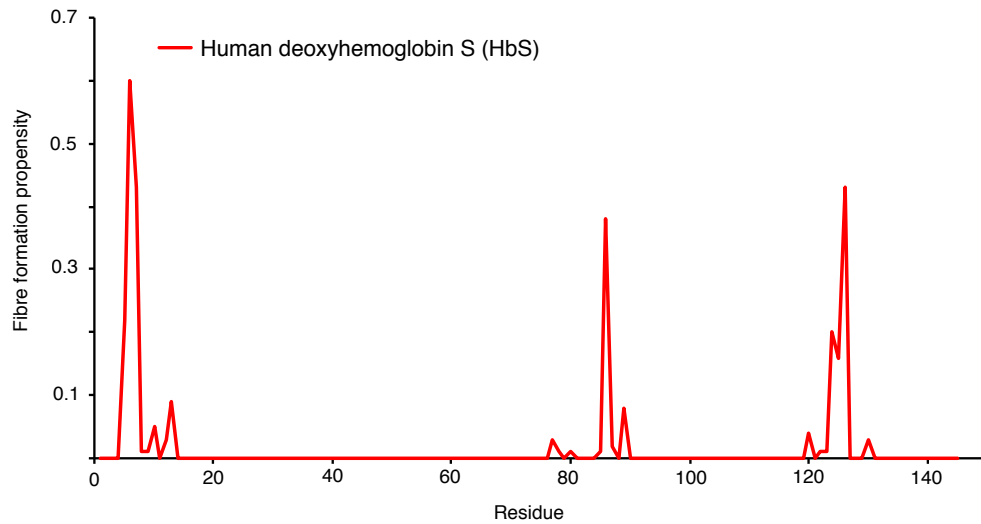

### Supplementary Figure 5

**Fibre formation propensity for human HbS.** Fibre formation is assumed to occur via an interaction between the EF pocket on one  $\beta$ -globin molecule and a given focal residue in a  $\beta$ -globin molecule in the other strand of the fibre, essentially as in Fig. 2d, but using the human HbS sequence. Fibre formation propensity represents the fraction of the 100  $\beta$ -globin dimer models built for each position that can form HbS-like fibres. The highest fibre formation propensity is observed for the valine at position 6.

**a**

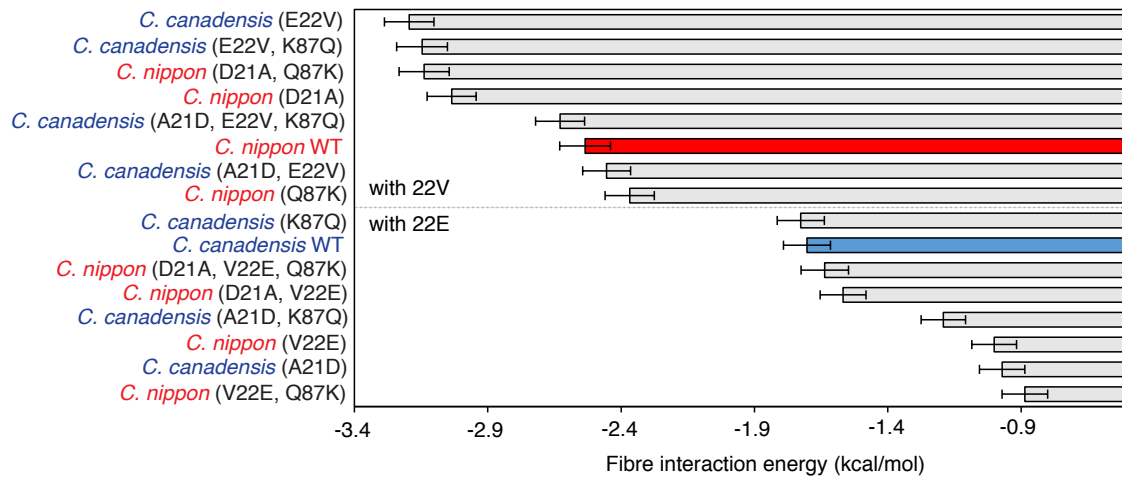

**b**

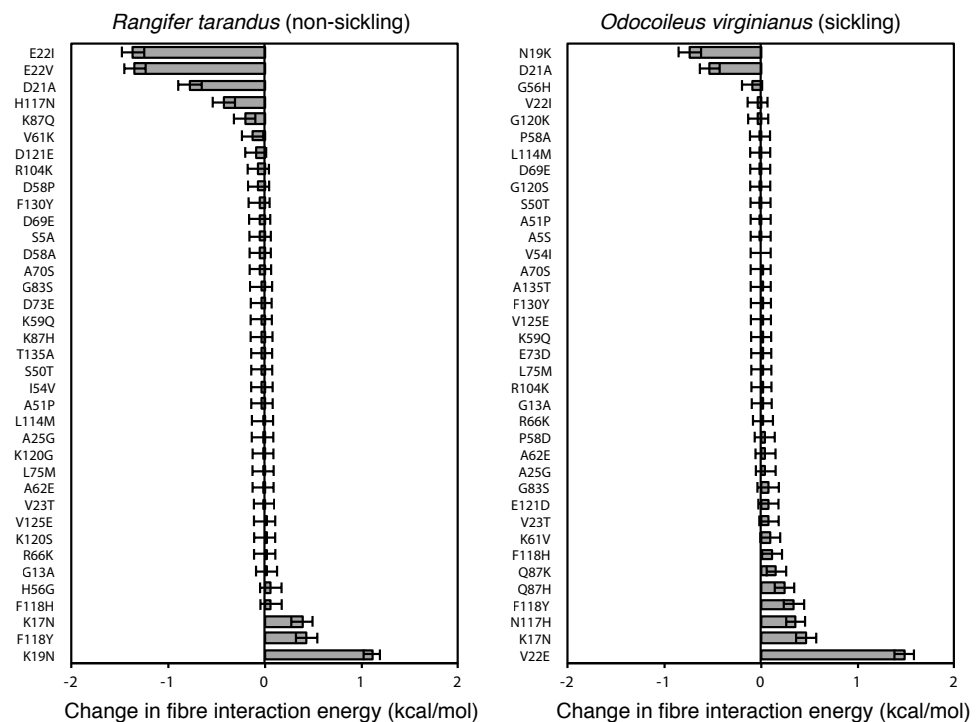

### Supplementary Figure 6

**Comparative structural investigation of key sickling residues.** **a**, Effects on fibre interaction energy of replacing defined single amino acids in  $HBB_A$  of *C. nippon* (sickling) with variant amino acids found in the closely related but non-sickling  $HBB_A$  sequence from *C. canadensis*, and vice versa. Fibre interaction energy is consistently higher for sequences that include 22V, regardless of the genetic background. **b**, Effects on fibre interaction energy of replacing defined single amino acids in the primary sequence of either *R. tarandus* or *O. virginianus*. All amino acids that differ between sickling and non-sickling sequences are considered. Negative values indicate stronger interactions and thus an increased likelihood of fibre formation. These values show the mean over all 270 22V-87Q docking models compatible with fibre formation, and error bars represent standard error of the mean.

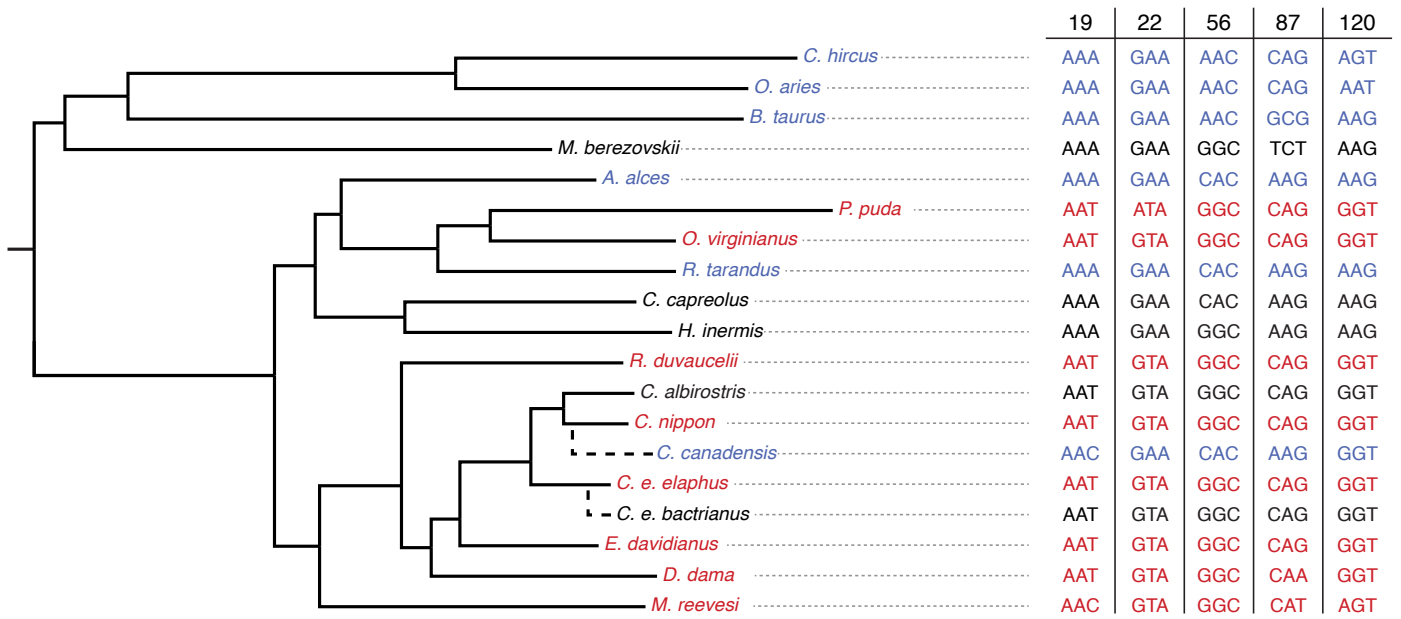

**Supplementary Figure 7**

**Codons specifying sickling-associated amino acids in  $HBB_A$  genes of different deer species.** Tip labels and associated codons are coloured and arranged along the species phylogeny as in Fig. 3a to illustrate the presence of the same codons in distantly related species.



**a**

| Recombination event | Sequence(s) with recombination signal               | Recombinant source | Breakpoints* |      | Significance of detection by method |          |          |          |          |          |          |
|---------------------|-----------------------------------------------------|--------------------|--------------|------|-------------------------------------|----------|----------|----------|----------|----------|----------|
|                     |                                                     |                    | Start        | End  | RDP                                 | GENECONV | BootScan | Maxchi   | Chimaera | SiScan   | 3Seq     |
| 1                   | <i>H. inermis</i> (A)                               | Foetal             | 172          | 344  | 4.25E-10                            | 2.65E-09 | 2.69E-10 | 5.26E-04 | 1.05E-03 | 1.40E-04 | 2.12E-07 |
| 2                   | <i>C. canadensis</i> (A)                            | Foetal             | 308          | 502  | 3.96E-06                            | 3.01E-05 | 3.17E-06 | 2.60E-03 | 4.27E-06 | 1.64E-04 | 4.29E-06 |
| 3                   | <i>C. capreolus</i> (F)                             | Adult              | 344          | 591  | 4.29E-04                            | NS       | 2.04E-03 | 8.53E-03 | 1.55E-03 | NS       | 1.34E-03 |
| 4                   | <i>D. dama</i> (A)                                  | Foetal             | 420          | 580  | NS                                  | NS       | NS       | 1.99E-03 | NS       | NS       | NS       |
| 5                   | <i>R. tarandus</i> (A)                              | Foetal             | 344          | 534  | NS                                  | NS       | NS       | 5.29E-03 | NS       | NS       | NS       |
| 6                   | <i>R. tarandus</i> (F)<br><i>O. virginianus</i> (F) | Adult              | 355          | 684  | NS                                  | NS       | NS       | 1.19E-02 | 6.44E-03 | NS       | NS       |
| 7                   | <i>R. duvaucelii</i> (A)                            | Foetal             | 96           | 170  | NS                                  | 1.24E-02 | NS       | NS       | NS       | NS       | NS       |
| 8                   | <i>O. virginianus</i> (A)<br><i>P. puda</i> (A)     | Foetal             | 772          | 894  | NS                                  | NS       | NS       | 2.21E-02 | NS       | NS       | NS       |
| 9                   | <i>P. puda</i> (A)                                  | Foetal             | 317          | 344  | NS                                  | NS       | 1.44E-02 | NS       | NS       | NS       | NS       |
| 10                  | <i>C. canadensis</i> (A)                            | Adult              | 1336         | 1466 | NS                                  | NS       | 4.64E-02 | NS       | NS       | NS       | NS       |
| 11                  | <i>O. virginianus</i> (F)<br><i>R. tarandus</i> (F) | Adult              | 156          | 304  | NS                                  | NS       | 4.84E-02 | NS       | NS       | NS       | NS       |

\*due to high local conservation, the exact breakpoint position can be uncertain. F: HBB<sub>F</sub>; A: HBB<sub>A</sub>; NS: Not significant.

**b**

| RDP option tab | RDP options different from default |           |       |                           |
|----------------|------------------------------------|-----------|-------|---------------------------|
|                | Window size                        | Step size | Model | Variable sites per window |
| BootScan*      | 20                                 | 5         | JN90  | -                         |
| SiScan         | 20                                 | 5         | -     | -                         |
| PhylPro        | 40                                 | -         | -     | -                         |
| VisRD          | 100                                | -         | -     | -                         |
| DSS(TOPAL)     | 40                                 | 5         | JN90  | -                         |
| Distance Plots | 40                                 | 5         | JN90  | -                         |
| MaxChi         | -                                  | -         | -     | 50                        |
| Chimaera       | -                                  | -         | -     | 50                        |

\*In addition for BootScan: Relationship measure = UPGMA, Bootstrap replicates = 300

**c**

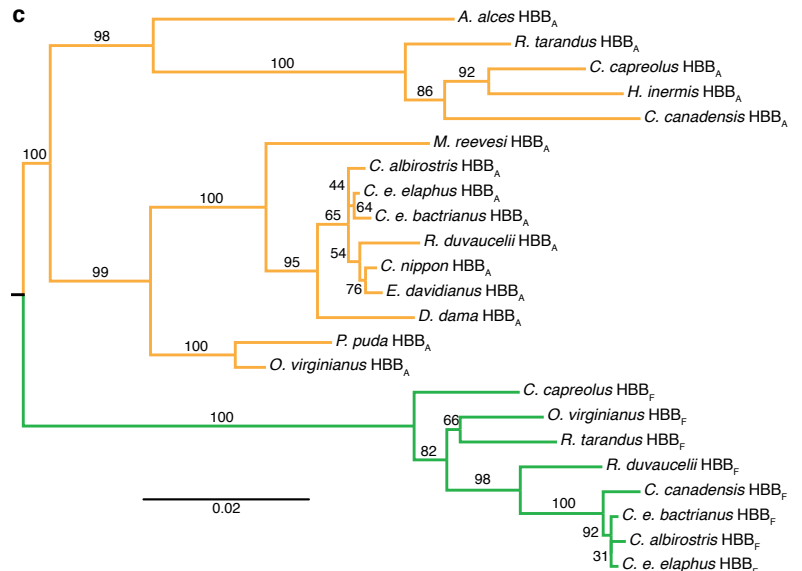

## Supplementary Figure 8

**Detection of gene conversion and introgression events in deer  $\beta$ -globin genes. a,** Recombination events predicted by different methods from an alignment of deer HBB<sub>F</sub> and HBB<sub>A</sub> genes. Breakpoint positions are given relative to each focal sequence. Where two sequences are affected (events 6,8,11) positions refer to the top sequence. **b,** Non-default parameters used for detecting recombination events with RDP. **c,** Maximum likelihood tree derived from the alignment of adult (orange) and foetal (green)  $\beta$ -globin genes after predicted recombinant regions have been removed. Branch support values (%) are derived from 1000 bootstrap replicates (see Methods for further information on tree reconstruction).

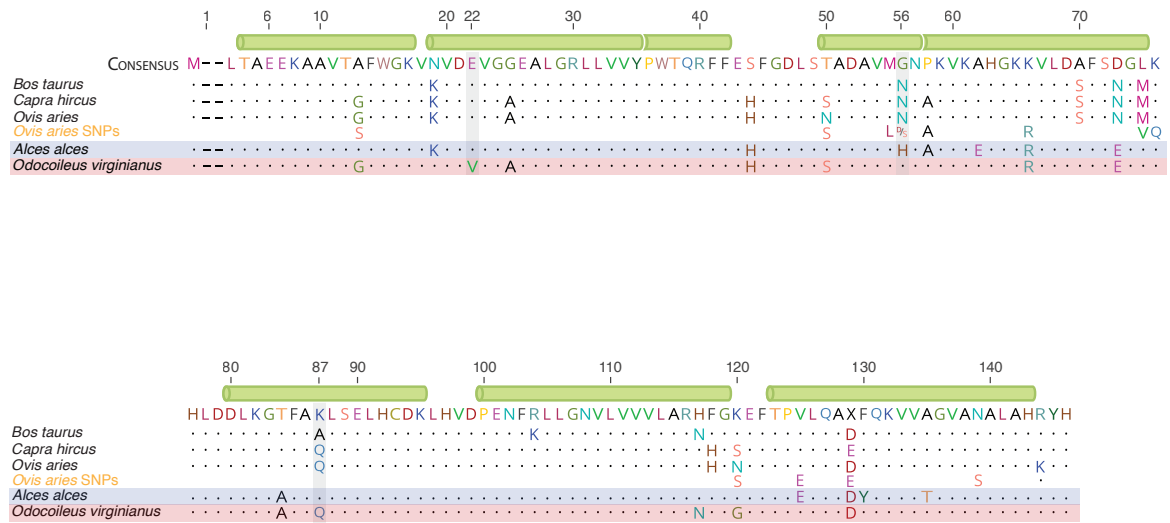

### Supplementary Figure 9

**Sheep HBB<sub>A</sub> diversity.** An excerpt from the alignment in Fig. 1 is shown alongside amino acid variants, found across 75 breeds of sheep, that differ from the *O. aries* reference sequence. All seven residues previously found to differentiate HbA and HbB (see main text) are recovered (50S, 58A, 75V, 76Q, 120S, 129E, 144R, where the letter indicates the amino acid found in HbA).

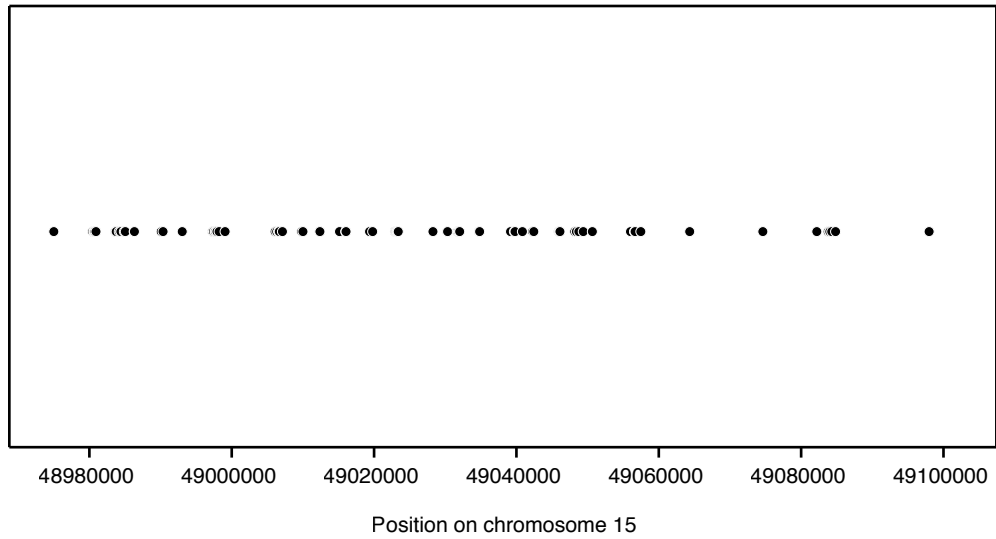

**Supplementary Figure 10**

**Mapping locations in the *B. taurus* genome of reads used to seed *O. virginianus* HBB<sub>A</sub> local assembly.**

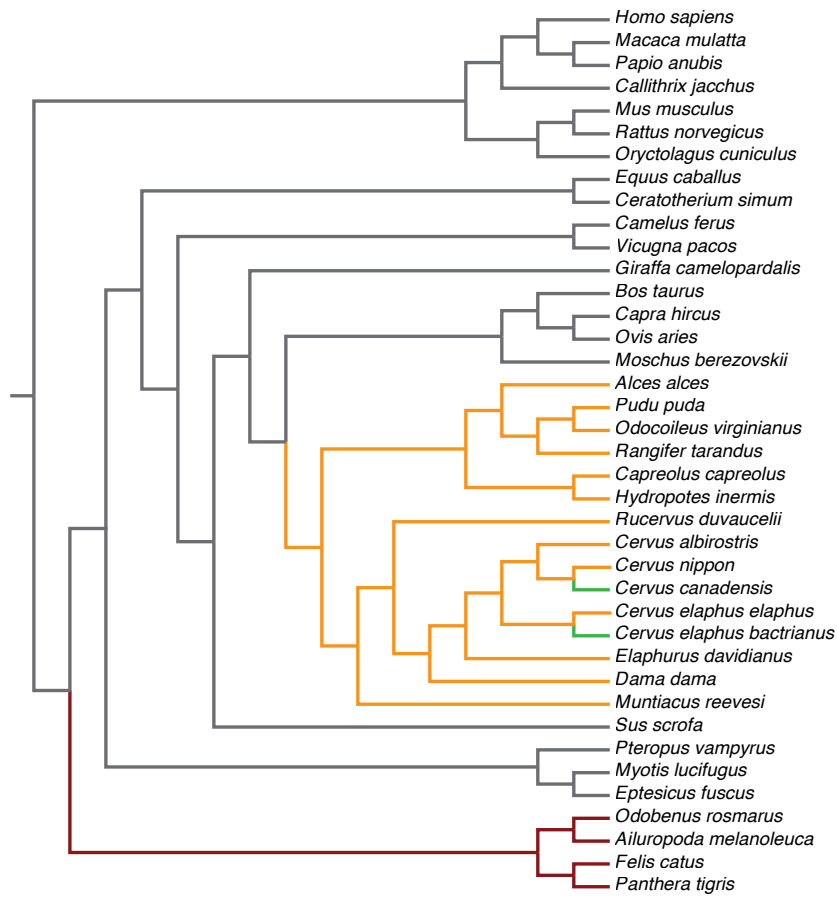

**Supplementary Figure 11**

**Cladogram of the mammalian species phylogeny used in this study.** Coloured branches indicate deviations from and additions to the Timetree of Life phylogeny (see Methods); red: re-grafted Carnivora; orange: 10kTrees deer phylogeny; green: manually added branches absent from the 10kTrees phylogeny.

| Species                          | Common Name          | Sample | Sample type              | Source                                                                           | Sickling state   | References              |
|----------------------------------|----------------------|--------|--------------------------|----------------------------------------------------------------------------------|------------------|-------------------------|
| <i>Odocoileus virginianus</i>    | White-tailed deer    | WTD    | Blood*                   | Penn State Deer Research Centre,<br>Pennsylvania PA 16802, USA                   | Sickling†        | 8,10,15,18,<br>20,23,86 |
| <i>Dama dama</i>                 | Fallow deer          | BFD    | Blood*                   | ZSL Whipsnade Zoo, Whipsnade,<br>Dunstable, LU6 2LF, UK (ZSL)                    | Sickling         | 9-11,42                 |
| <i>Rucervus duvaucelii</i>       | Swamp deer           | SD     | Blood*                   | ZSL                                                                              | Sickling†        | 11,42,86                |
| <i>Elaphurus davidianus</i>      | Père David's deer    | PDD    | Blood*                   | ZSL                                                                              | Sickling         | 9-11,42                 |
| <i>Cervus nippon</i>             | Sika deer            | SIKA   | Blood*                   | ZSL                                                                              | Sickling†        | 9-11,22,42,<br>86,87    |
| <i>Cervus elaphus elaphus</i>    | Red deer             | RED    | Blood                    | RZSS Highland Wildlife Park, Kincaig,<br>Kingussie, PH21 1NL, UK (RZSS)          | Sickling         | 9-11,17,42              |
| <i>Cervus elaphus bactrianus</i> | Bactrian deer        | BACT   | Blood                    | RZSS                                                                             | Indeterminate    |                         |
| <i>Cervus albirostris</i>        | Whitelipped deer     | WLD    | Blood                    | RZSS                                                                             | Indeterminate    |                         |
| <i>Alces alces</i>               | European elk (Moose) | ELK    | Blood / Muscle<br>tissue | RZSS / Kezie Foods, Duns, TD11 3TT, UK                                           | Does not sickle  | 9,11,42                 |
| <i>Rangifer tarandus</i>         | Reindeer             | REIN   | Blood / Muscle<br>tissue | RZSS / Kezie Foods, Duns, TD11 3TT, UK                                           | Does not sickle  | 9-11,42                 |
| <i>Muntiacus reevesi</i>         | Reeve's muntjac      | MUNT   | Muscle tissue            | The Wild Meat Company, Woodbridge,<br>IP12 2DY, UK                               | Sickling         | 8,11,42                 |
| <i>Pudu puda</i>                 | Pudu                 | PUDU   | Blood                    | Bristol Zoo, Bristol Zoo Gardens, Clifton,<br>Bristol, BS8 3HA, UK               | Sickling         | 42,85                   |
| <i>Capreolus capreolus</i>       | Roe deer             | ROE    | Tissue                   | V. Savolainen                                                                    | Indeterminate    |                         |
| <i>Hydropotes inermis</i>        | Chinese water deer   | CWD    | Tissue                   | V. Savolainen                                                                    | Indeterminate‡   | 10,42                   |
| <i>Cervus canadensis</i>         | Wapiti (Elk)         | WAP    | Genomic DNA              | East Stroudsburg University, 200 Prospect<br>St, East Stroudsburg, PA 18301, USA | Does not sickle† | 9-12,42                 |

\*Fresh blood samples processed with the PAXgene Blood DNA kit.

†Both sickling and non-sickling adult individuals previously recorded.

‡Only one individual tested (non-sickling). Conservatively listed as indeterminate.

## Supplementary Table 1

**Species considered in this study, previous evidence for sickling and sample origins.** For each sample, species identity was confirmed by sequencing the mitochondrial *cytB* gene (see Methods, Supplementary Table 2). For species in which both sickling and non-sickling individuals have been previously identified, the more common phenotype (as found in the associated references) is listed.

## Supplementary Discussion

### *Why is sickling in deer better tolerated than in humans? – a brief note*

Although patterns of evolution of HBB<sub>A</sub> suggest that sickling is associated with fitness costs and benefits, it is striking, especially in comparison to HbS, that sickling homozygotes do not exhibit an easily measurable phenotype. As pointed out in previous literature on the subject, two features of deer erythrocytes in particular might contribute to reduced sickling cost: they are small and they are pliable.

First, the cause of haemolytic anaemia in human sickle cell patients can be traced to the increased mechanical fragility of their red blood cells (RBCs). In deer, on the other hand, sickled and non-sickled cells have the same mechanical fragility<sup>23</sup>. Why sickled deer erythrocytes remain highly pliable despite extensive internal polymer formation remains unknown. Future comparative studies of cytoskeletal architecture and membrane composition will be interesting in this regard.

Second, as noted by Gulliver himself, RBCs in deer appear unusually small compared to other mammals<sup>88</sup>. This might reduce the probability of vaso-occlusions, under the assumption that capillary diameter is constant across mammals and has not decreased proportionally in deer. We will revisit this assumption below. First, however, we want to revisit the claim that deer RBCs are unusually small in the context of allometric scaling. To do so, we intersected measurements of RBC diameters made by Gulliver for more than 200 mammals, with more recent data on body mass from the PanTHERIA database<sup>89</sup>. We manually matched old and new taxonomic names and re-assigned the correct Order where necessary. We only considered taxa that could be unambiguously matched to an extant taxon, excluded camelids (which have atypical oval-shaped RBCs) and added data on five additional deer species from <http://www.genomesize.com/cellsizes/mammals.htm>.

We then considered the relationship between body mass and RBC diameter. There is a persistent claim in the literature, prominently advocated by Schmidt-Nielsen<sup>90</sup> and subsequently West and colleagues<sup>91</sup>, that RBC size is body mass invariant. This indeed appears to be the case when all mammals are considered together (left-hand panel in Figure A below). However, we find strong scaling relationships within different mammalian Orders. Notably, scaling coefficients are indistinguishable for Rodentia, Primates, and Carnivora (middle panel in Figure A), whereas Artiodactyla – which include deer – exhibit deviant scaling behaviour, with RBC size dropping faster with decreasing body mass than in other mammalian orders. It therefore appears that the relationship between RBC size and body mass in artiodactyls is governed by a different design principle than in other mammals. However, this constitutes insufficient evidence to claim that small RBC size in deer mitigates sickling effects. As highlighted above, this logic hinges on the assumption that – while RBC size drops – terminal capillary size (e.g. in lung alveoli) remains constant. Is this true? The same authors that argued for body mass-invariant RBC size assume that terminal capillary diameter is body size invariant<sup>92</sup> but there is no concrete empirical data to support this claim, which is extrapolated from a cross-species study of nephron diameters in the kidney. In light of the fact that RBC size does, in fact, vary with body mass, as we demonstrate here, we think assertions about invariant capillary diameters across mammals are premature. Thus, although artiodactyls do show unusually small

RBCs and a different scaling relationship with body mass, in the absence of corresponding data on capillary diameters, we cannot establish whether this would impact the probability of vaso-occlusion. What we can say, however, is that RBC size of sickling deer does not scale any differently from that of non-sickling deer (right-hand panel in Figure A).

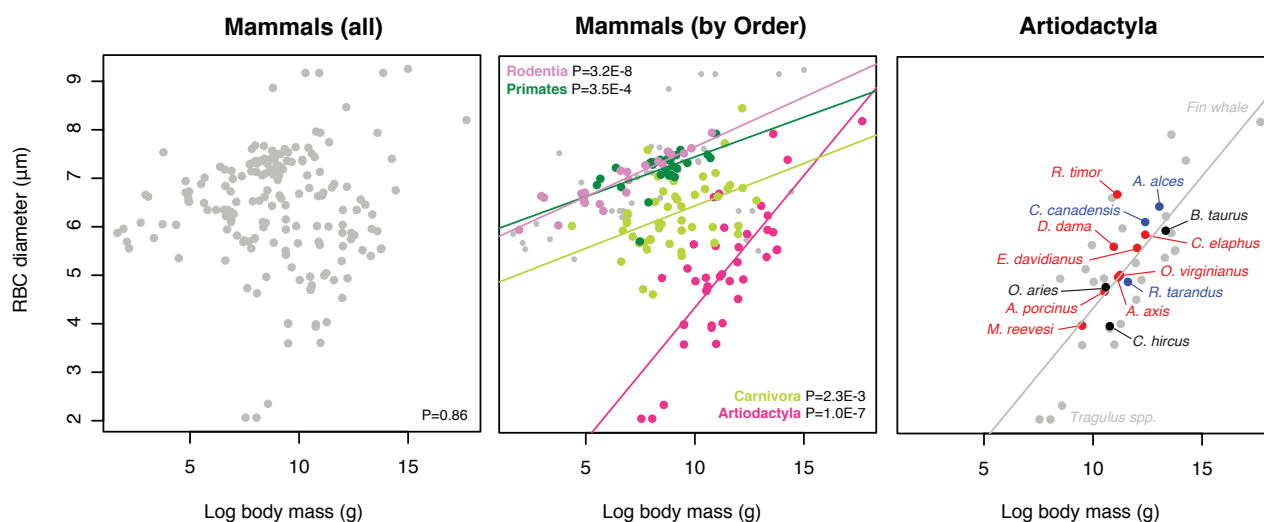

**Figure A**

### Supplementary References

85. Junge, R. E., Duncan, M. C., Miller, R. E., Gregg, D. & Kombert, M. Clinical presentation and antiviral therapy for poxvirus infection in pudu (*Pudu puda*). *Journal of Zoo and Wildlife Medicine* **31**, 412–418 (2000).
86. Weisberger, A. S. The Sickling Phenomenon and Heterogeneity of Deer Hemoglobin. *Proceedings of the Society for Experimental Biology and Medicine* **117**, 276–280 (1964).
87. Ogawa, E., Hasegawa, M., Fujise, H. & Kobayashi, K. Erythrocyte Sickling in Sika Deer (*Cervus nippon*). *J. Vet. Med. Sci.* **53**, 1075–1077 (1991)
88. Gulliver, G. Observations on the sizes and shapes of the red corpuscles of the blood of vertebrates, with drawings of them to a uniform scale, and extended and revised tables of measurements. *Proceedings of the Zoological Society of London* **1**, 474–495 (1875).
89. Jones, K. E. *et al.* PanTHERIA: a species-level database of life history, ecology, and geography of extant and recently extinct mammals. *Ecology* **90**, 2648–2648 (2009).
90. Schmidt-Nielsen, K. *Scaling*. (Cambridge University Press, 1984).
91. Savage, V. M. *et al.* Scaling of number, size, and metabolic rate of cells with body size in mammals. *Proceedings of the National Academy of Sciences of the United States of America* **104**, 4718–4723 (2007).
92. West, G. B., Brown, J. H. & Enquist, B. J. A General Model for the Origin of Allometric Scaling Laws in Biology. *Science* **276**, 122–126 (1997).
